# Supplementary material for: Curcumin decreases Warburg effect in cancer cells by down-regulating pyruvate kinase M2 via mTOR-HIF1α inhibition
Source: PubMed Central journal article supplement (PMC5974195; doi:10.1038/s41598-018-25524-3), 2018-05-29

**Curcumin decreases Warburg effect in cancer cells by down-regulating pyruvate kinase M2 via mTOR-HIF1 $\alpha$  inhibition.**

Farid Ahmad Siddiqui<sup>1</sup>, Gopinath Prakasam<sup>2</sup>, Shilpi Chattopadhyay<sup>3</sup>, Asad Ur Rehman<sup>4</sup>, Rayees Ahmad Padder<sup>1</sup>, Mohammad Afaque Ansari<sup>1</sup>, Rasha Irshad<sup>1</sup>, Kailash Mangalhara<sup>2</sup>, Rameshwar NK Bamezai<sup>2</sup>, Mohammad Husain<sup>1</sup>, Syed Mansoor Ali<sup>1</sup> and Mohammad Askandar Iqbal<sup>1†</sup>.

<sup>1</sup> Department of Biotechnology, Faculty of Natural Sciences, Jamia Millia Islamia, 1 110025, India

<sup>2</sup> School of Life Sciences, Jawaharlal Nehru University, New Delhi 110067, India

<sup>3</sup> Department of Toxicology, Jamia Hamdard University, New Delhi 110062, India

<sup>4</sup> Department of Biosciences, Faculty of Natural Sciences, Jamia Millia Islamia, New Delhi 110025, India

† Corresponding author: askandariqbal@gmail.com, miqbal2@jmi.ac.in.

Supplementary Figure S1.

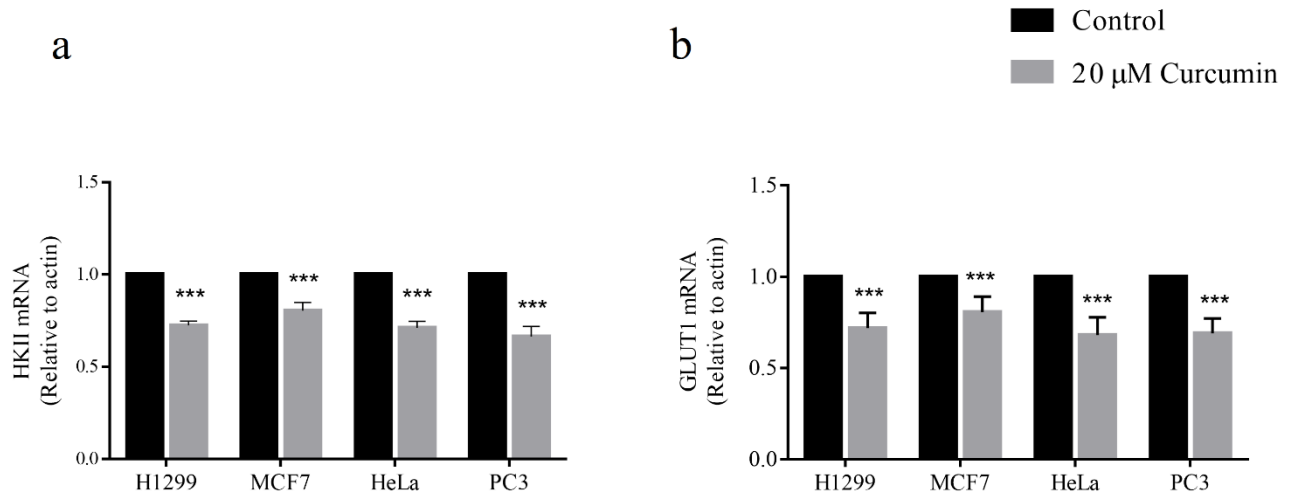

**Supplementary Figure S1. HKII and GLUT1 expression is inhibited by curcumin through mTOR/HIF1 $\alpha$  axis.** Substantial reduction in HKII (a) and GLUT1 mRNA (b) in H1299, MCF-7, HeLa and PC3 cells treated with 20  $\mu$ M of curcumin for 24 hours. Error bars in HKII and GLUT1 mRNA graph represent mean  $\pm$ SD.

Supplementary Figure S2.

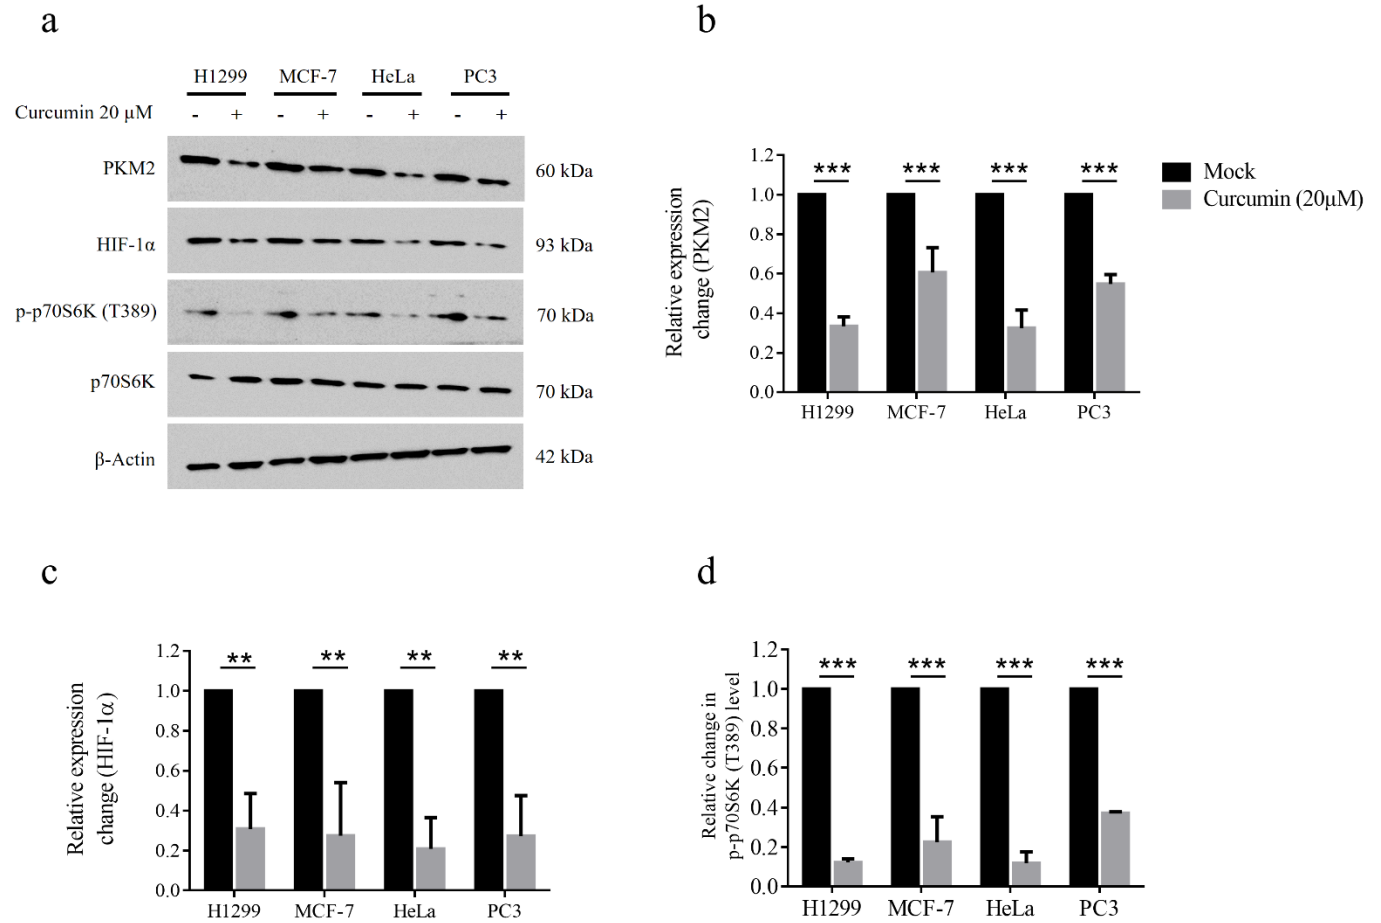

**Supplementary Figure S2. PKM2 expression is inhibited by curcumin through mTOR/HIF1 $\alpha$  axis.**

(a) Immunoblot of H1299, MCF-7, HeLa and PC3 cells showing coincided reduction in PKM2, HIF1 $\alpha$  and phosphorylated-p70S6K (T389), upon curcumin treatment. Bars represent the relative expression level of PKM2 (b), HIF1 $\alpha$  (c) and phosphorylated-p70S6K (T389) (d) in H1299, MCF-7, HeLa and PC3 cells treated with 20 $\mu$ M of curcumin for 24 hours. Error bars in graph represent mean  $\pm$ SD.

# Full-length gels uncropped Western Blots

## Figure 2B Raw Data

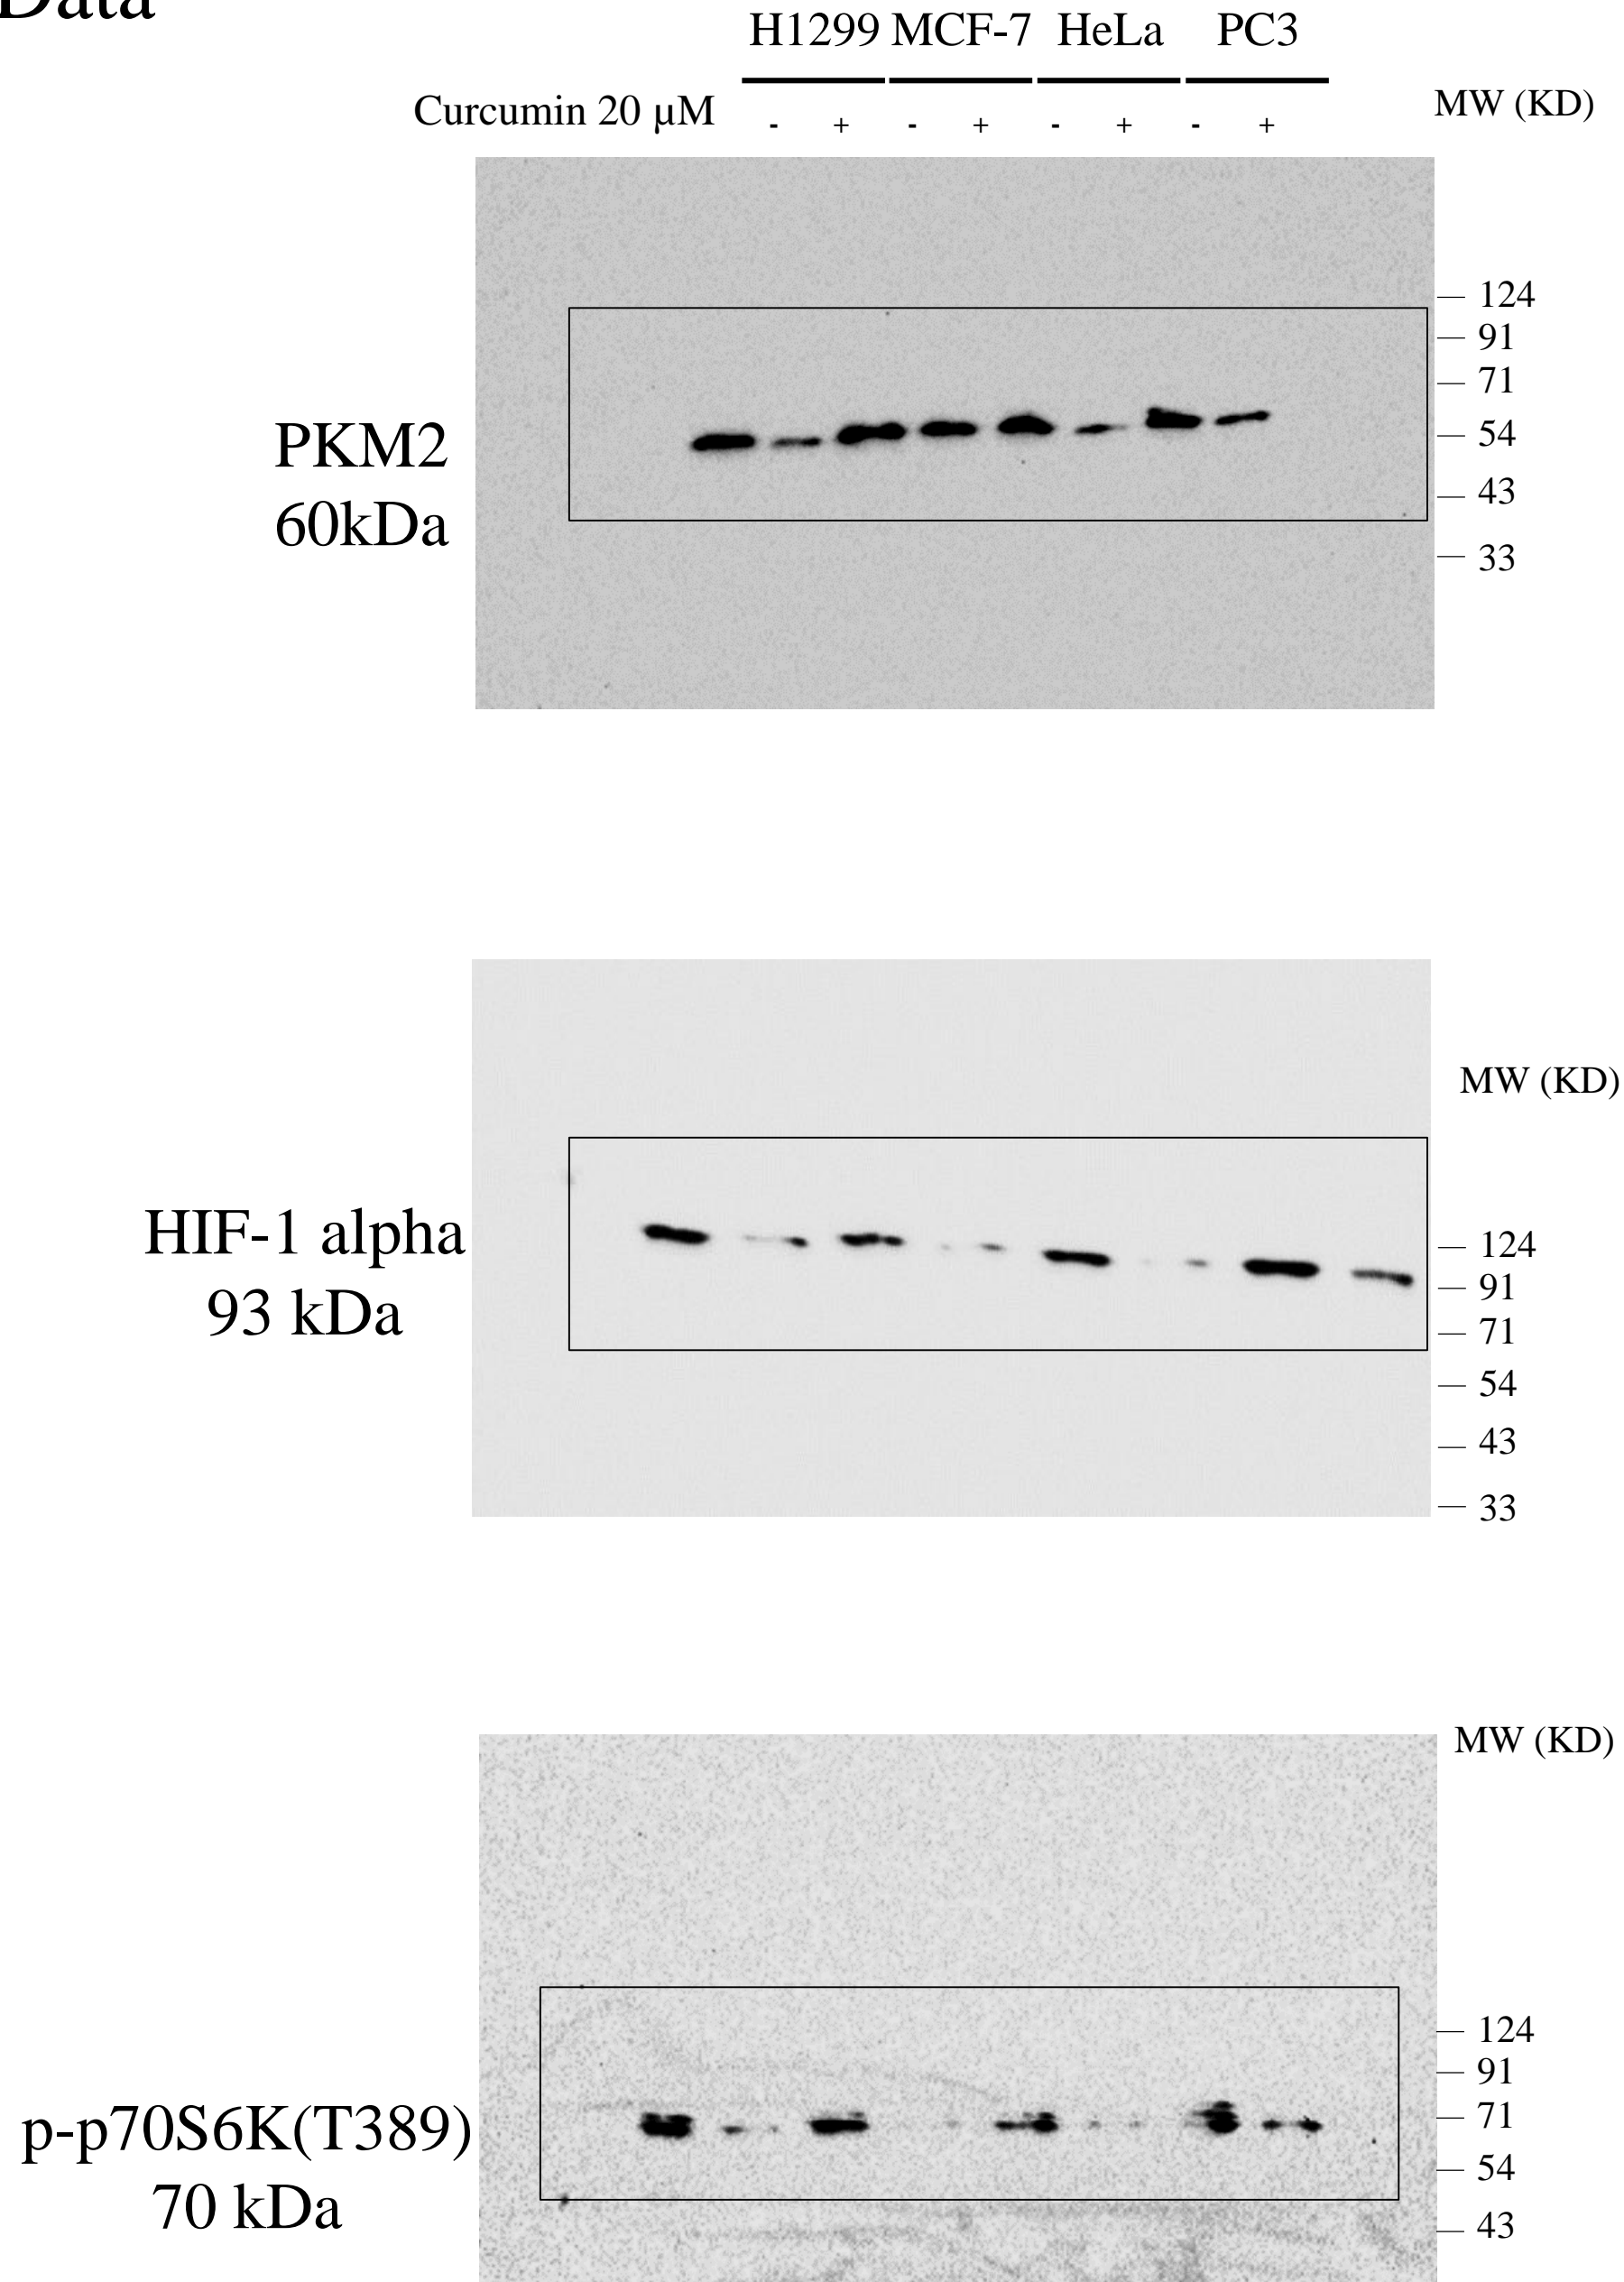

# Figure 2B Raw Data Cont..

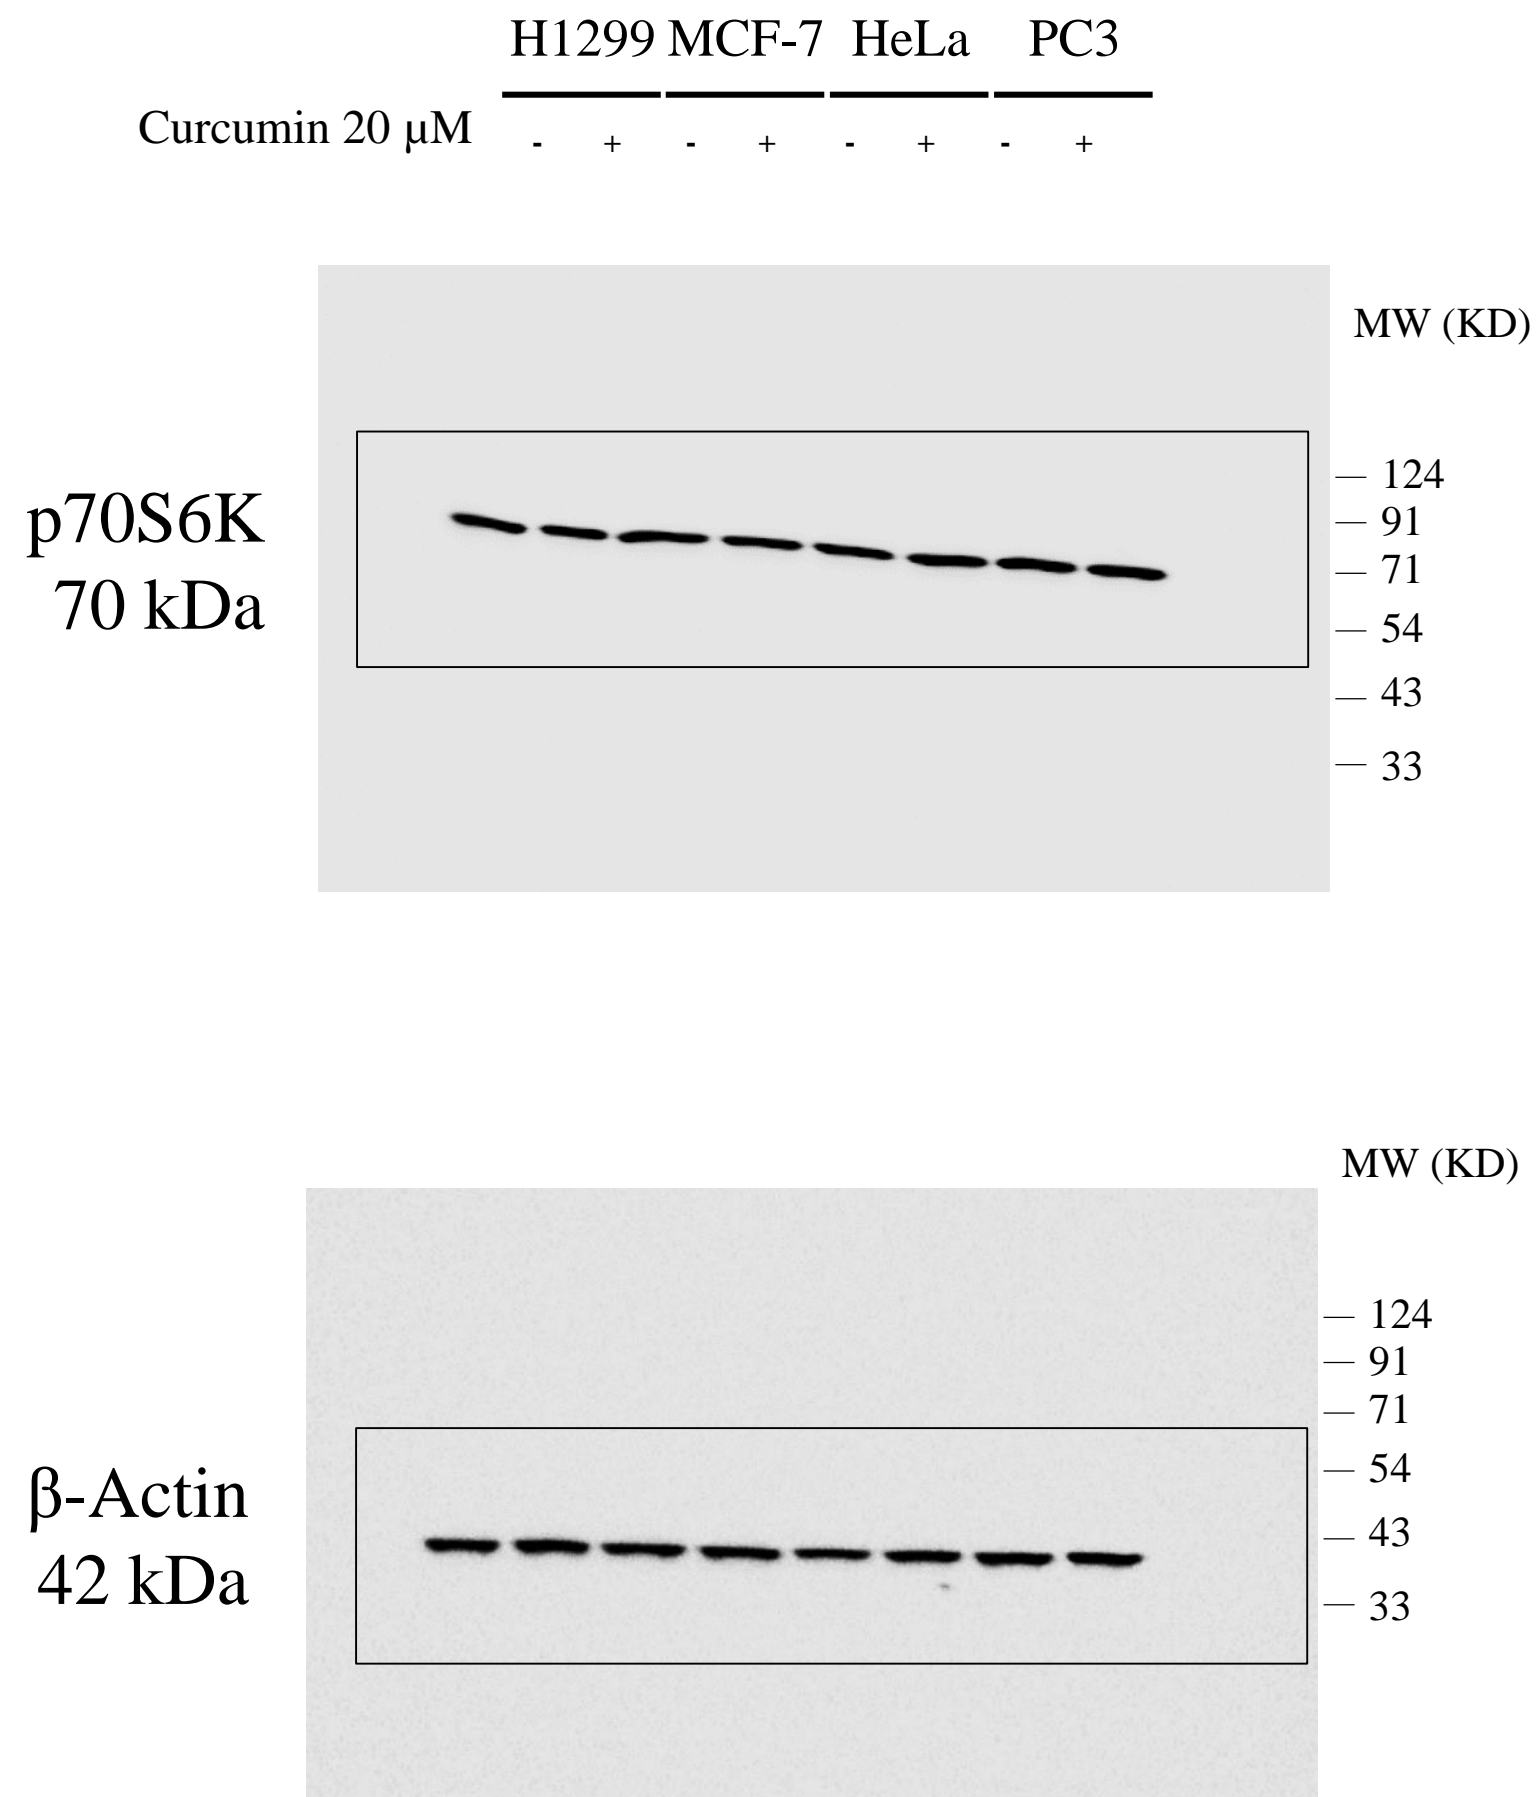

# Figure 2C Raw Data

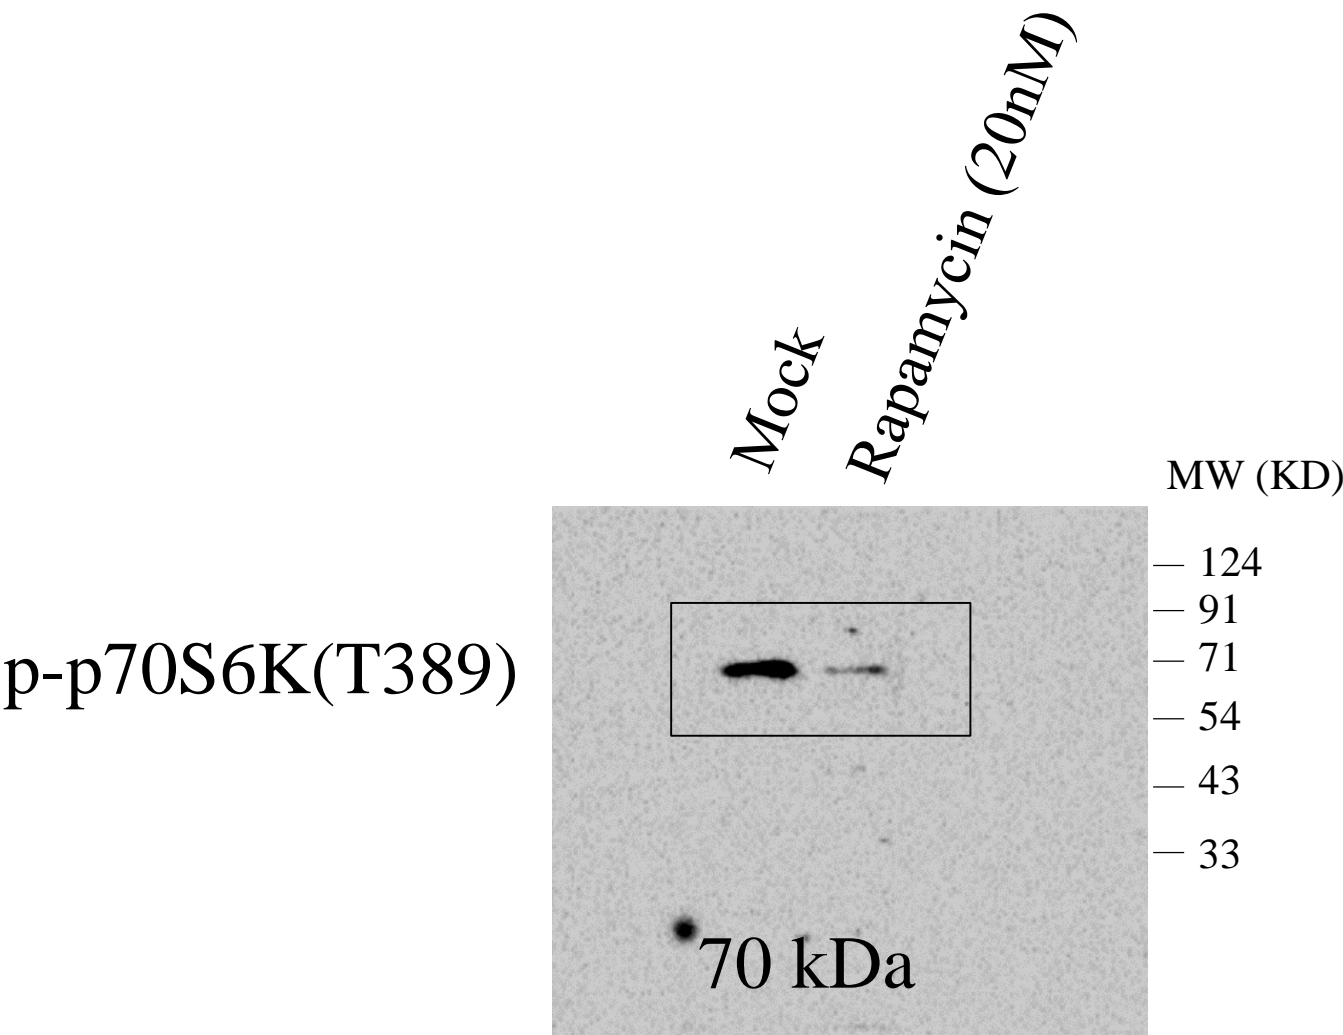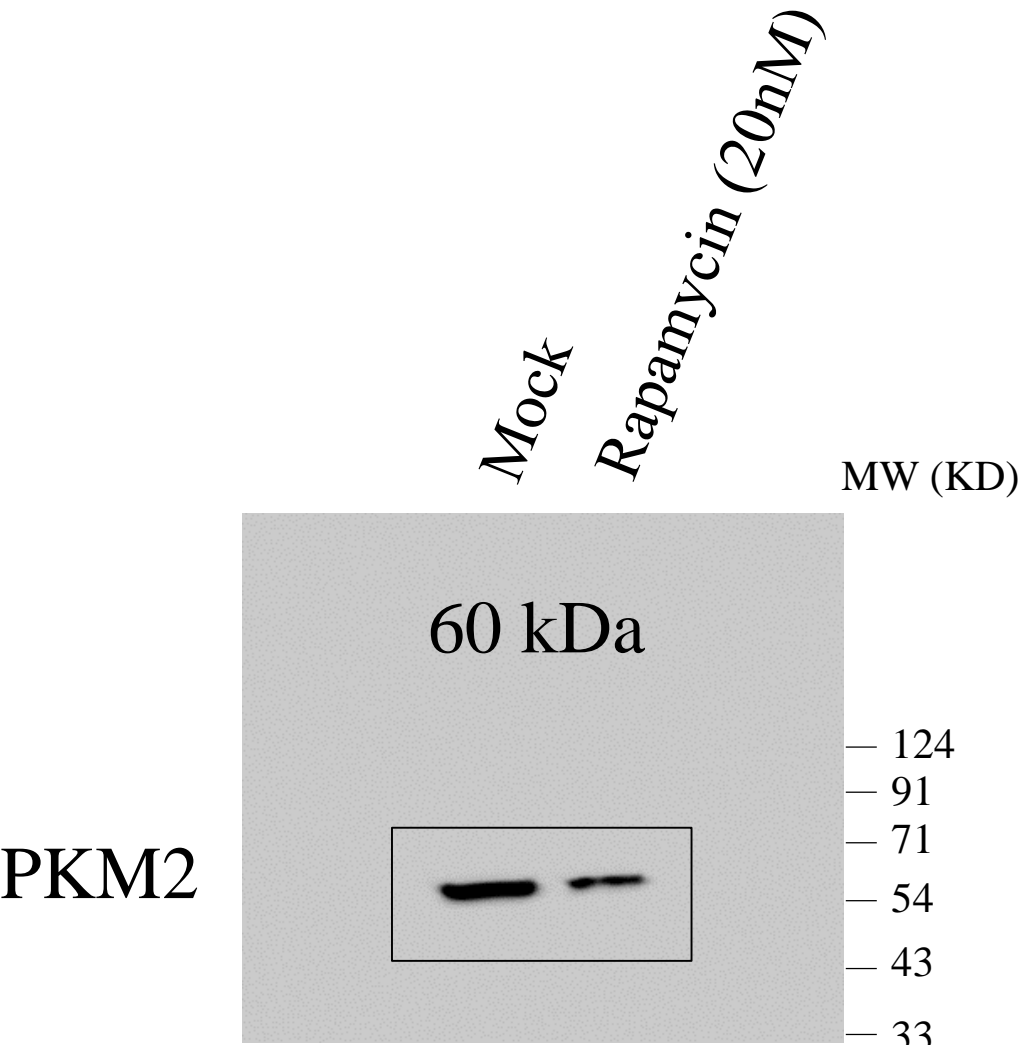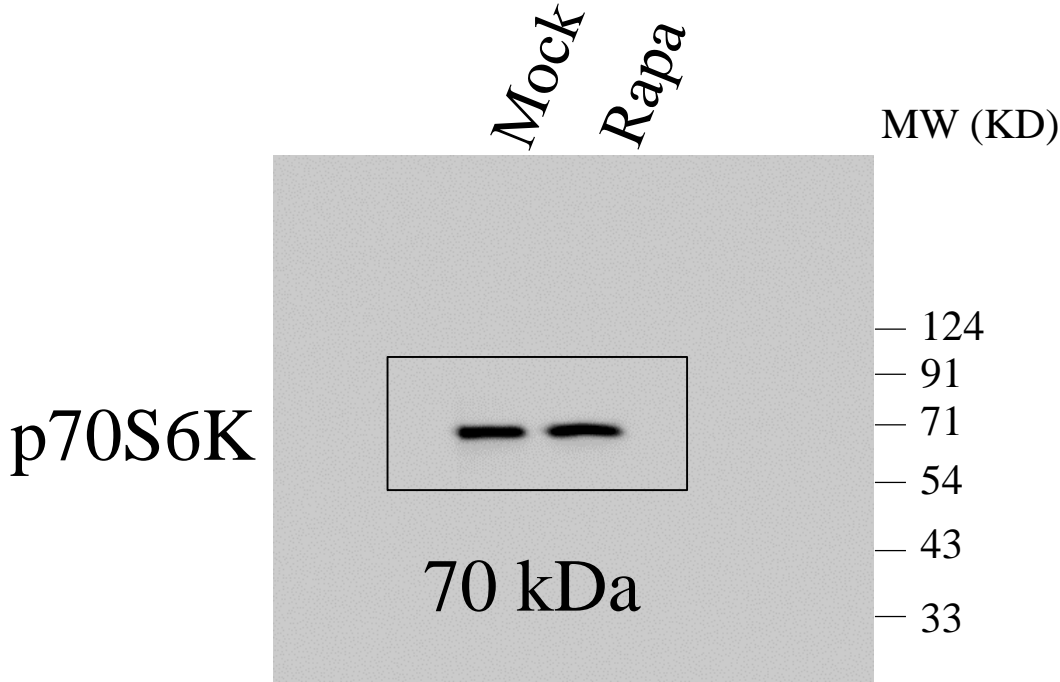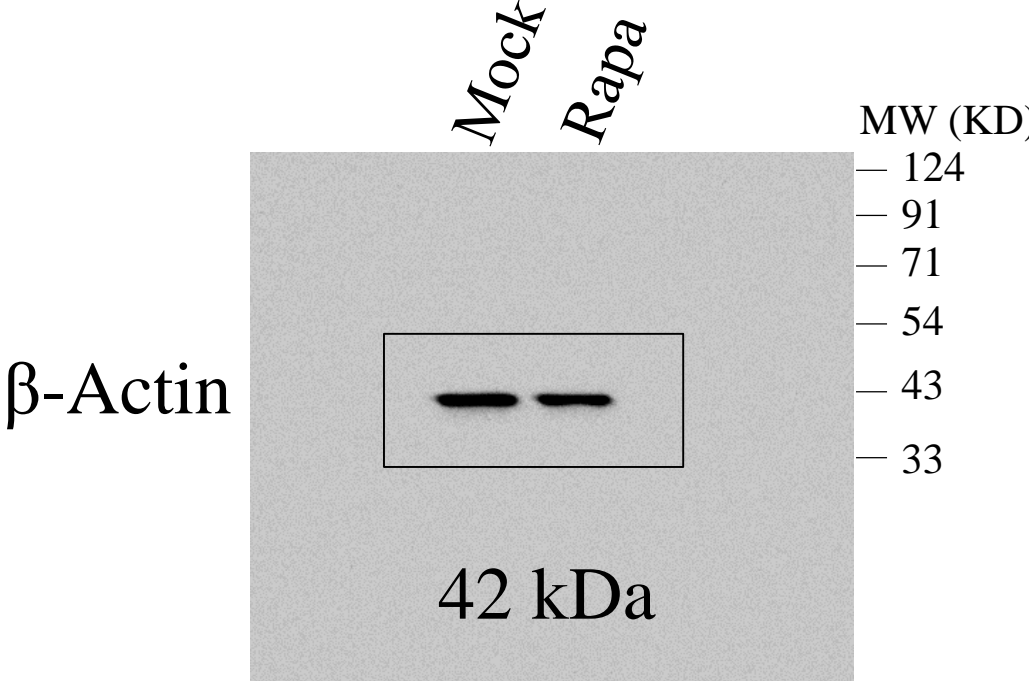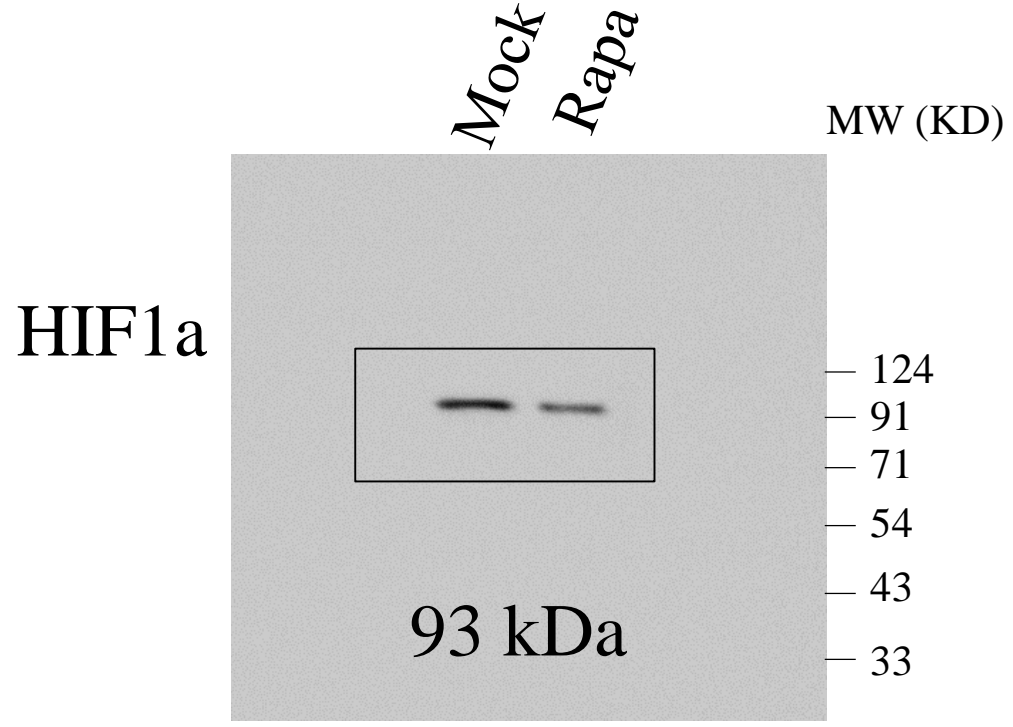

Figure 4A Raw Data

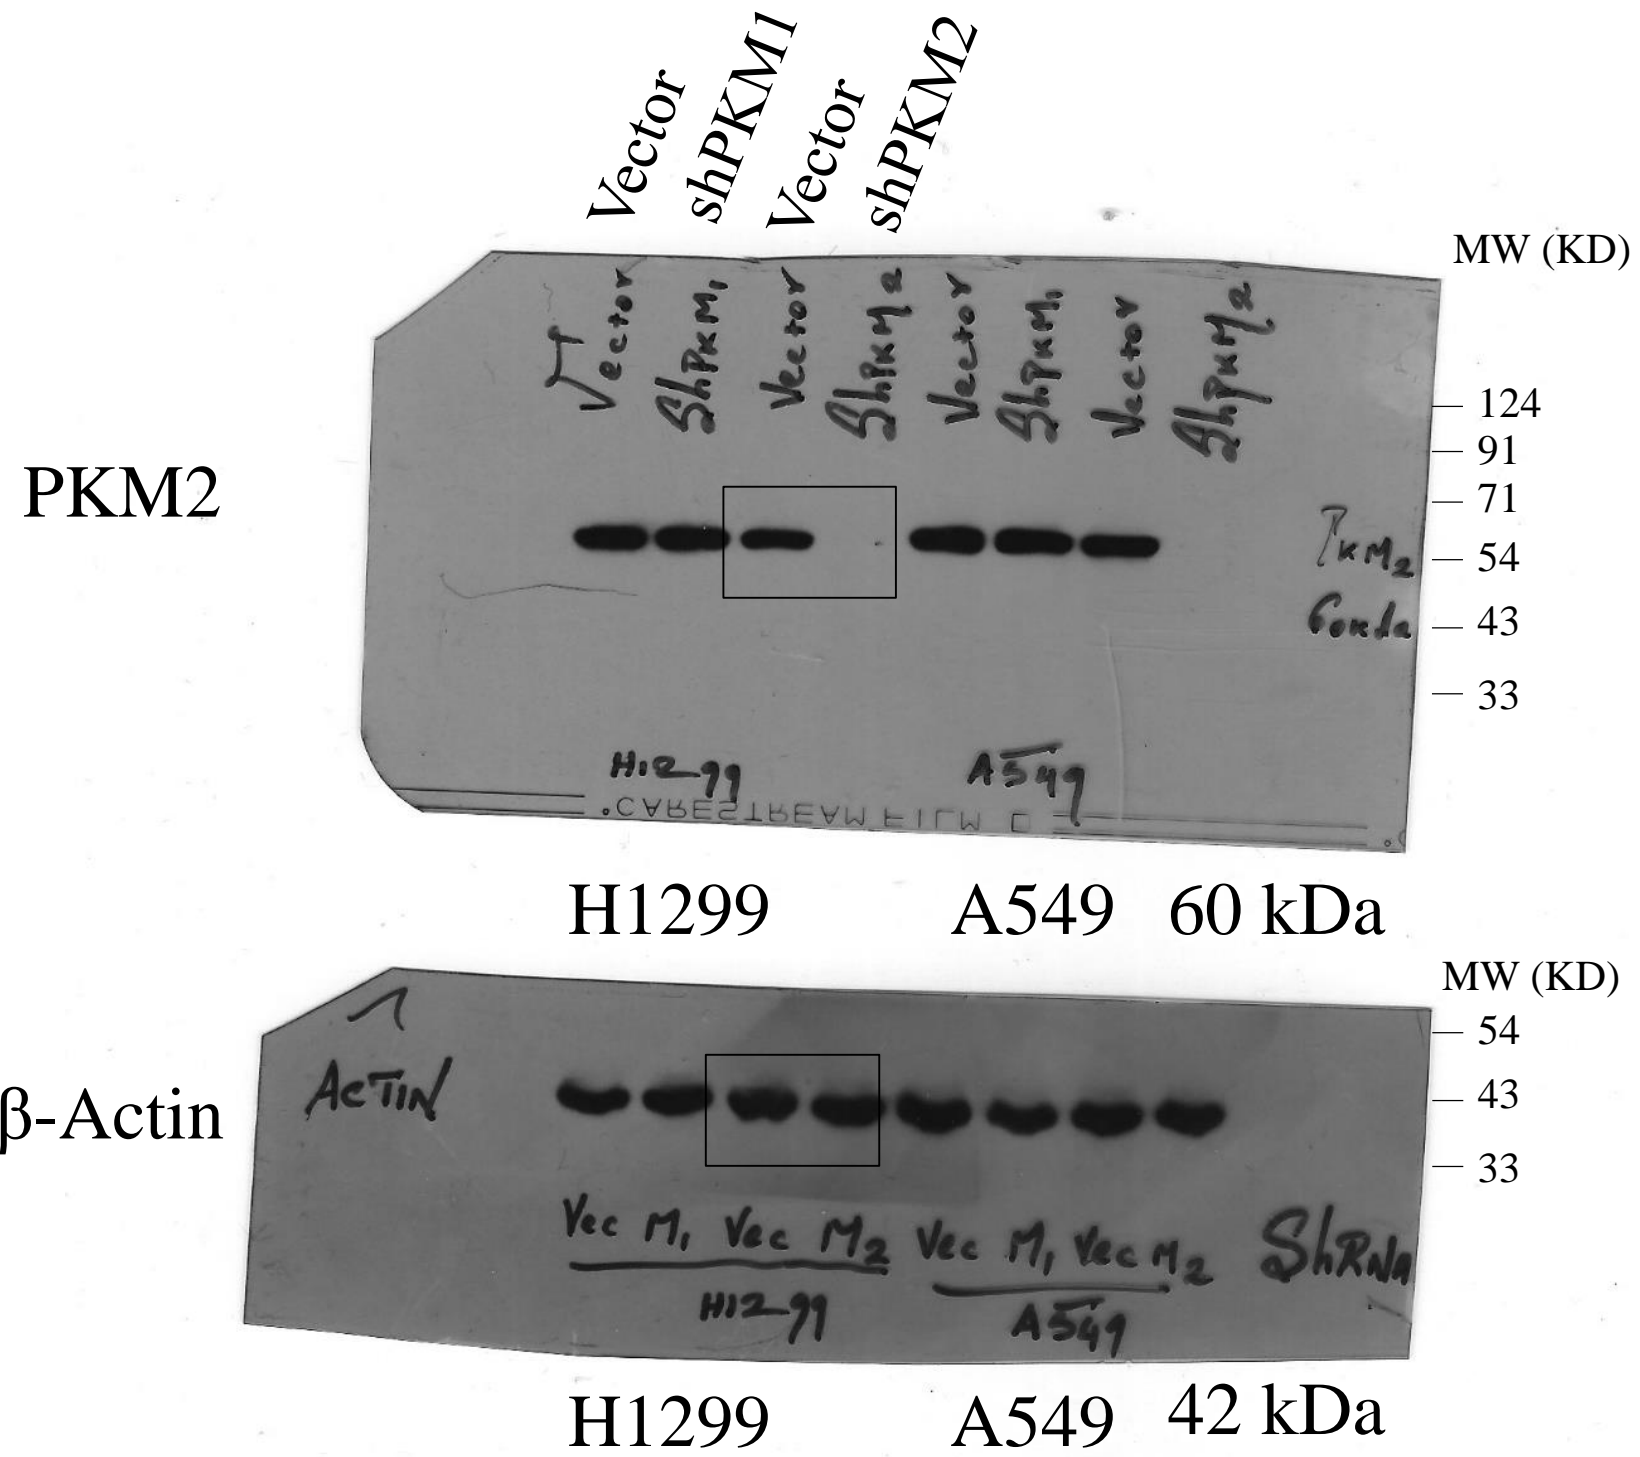

# Figure 5A Raw Data

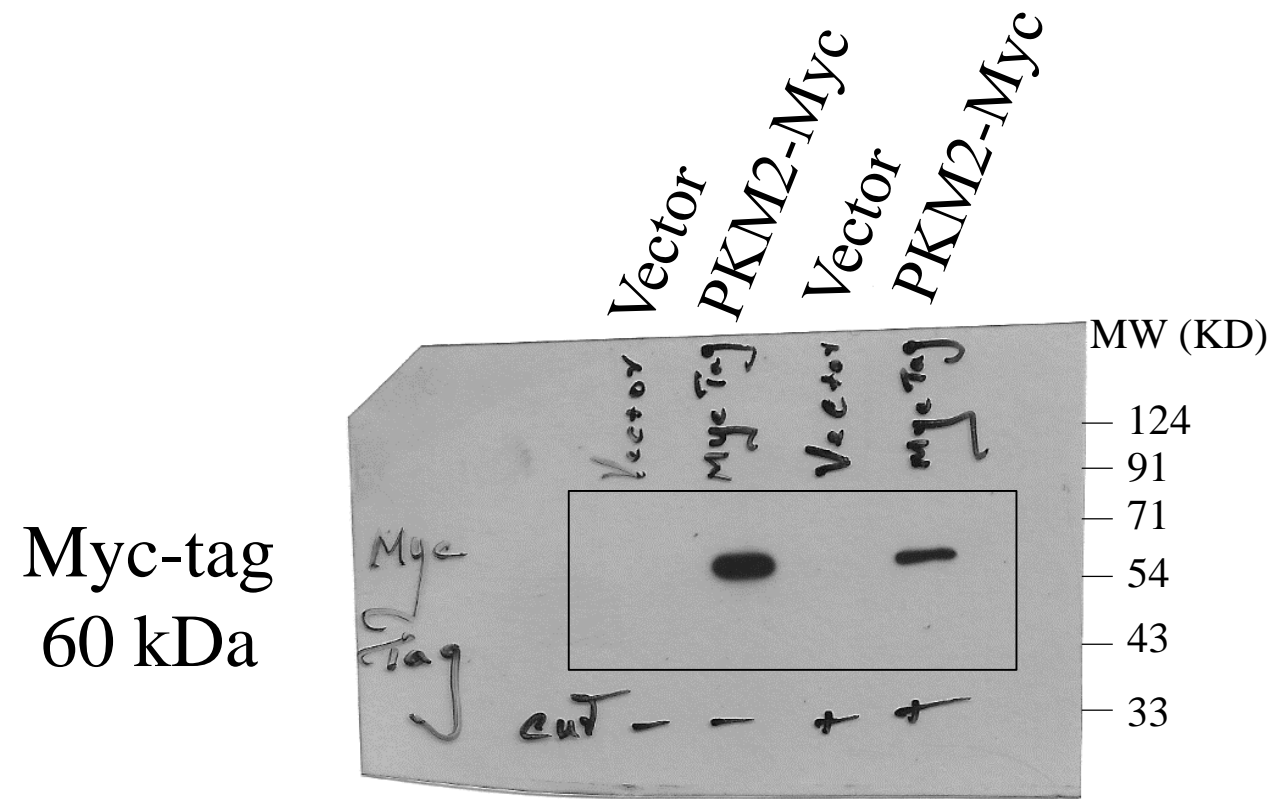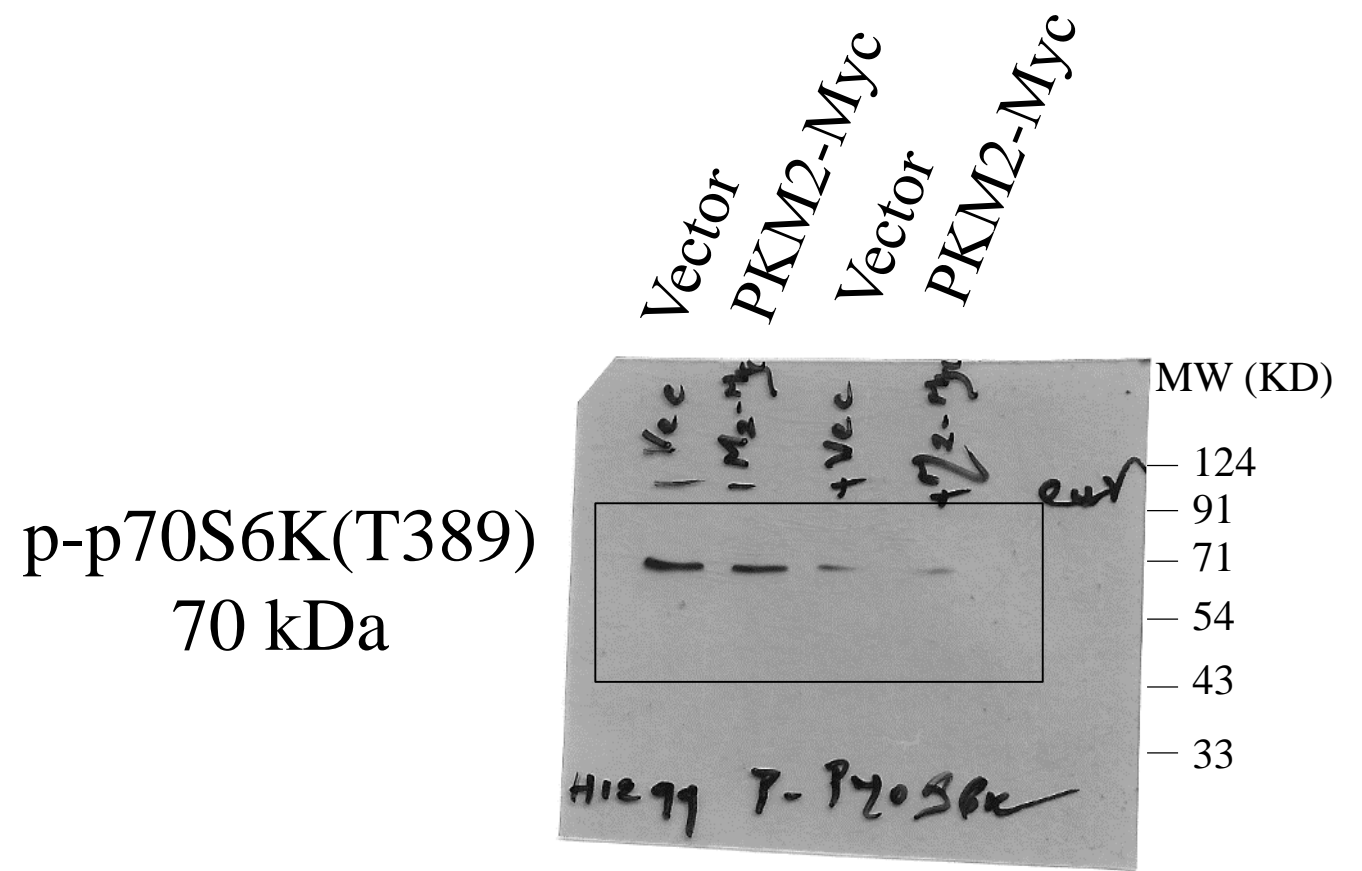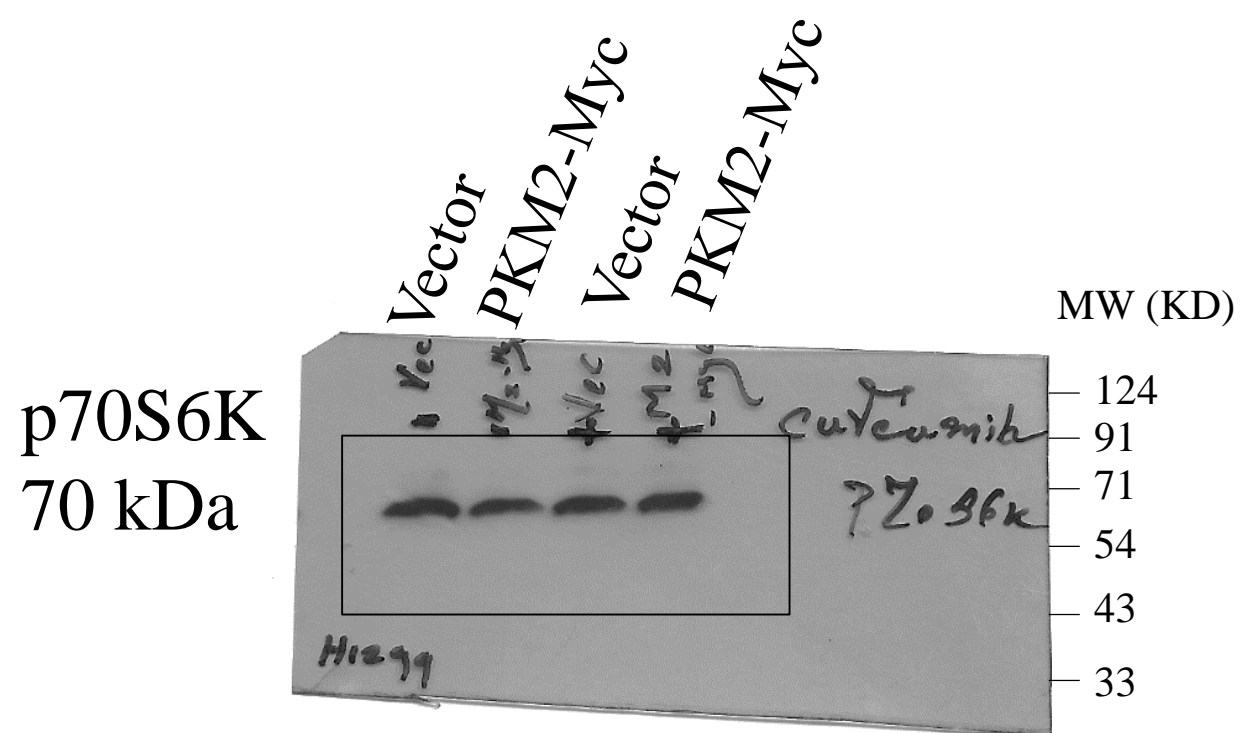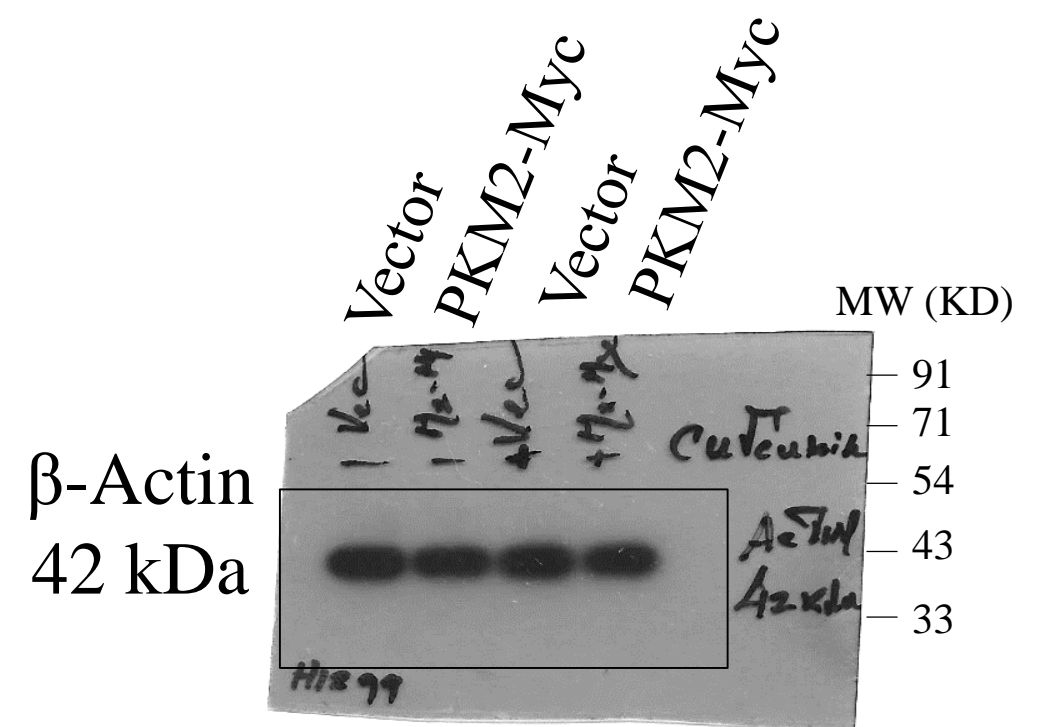



# Supplementary Figure 2 Raw data

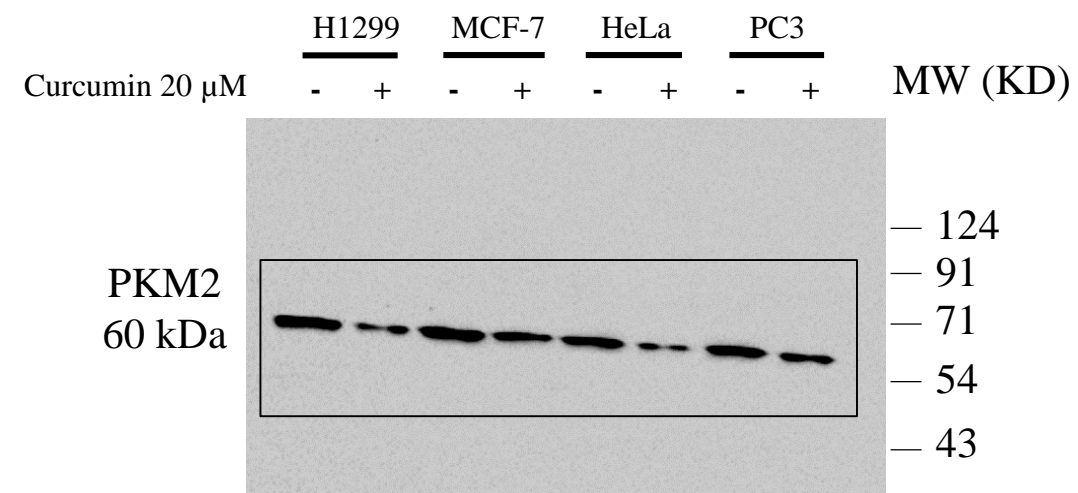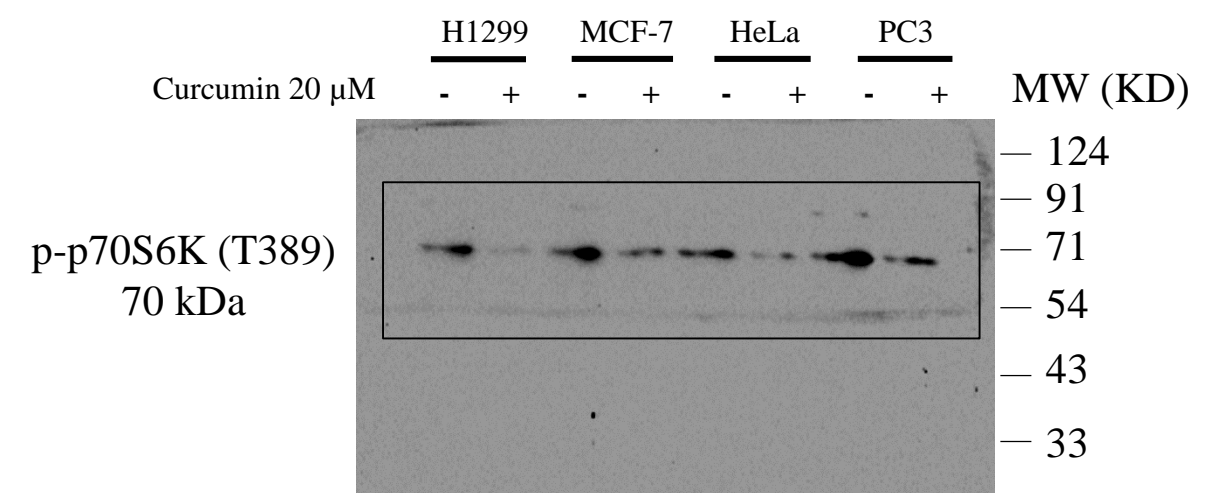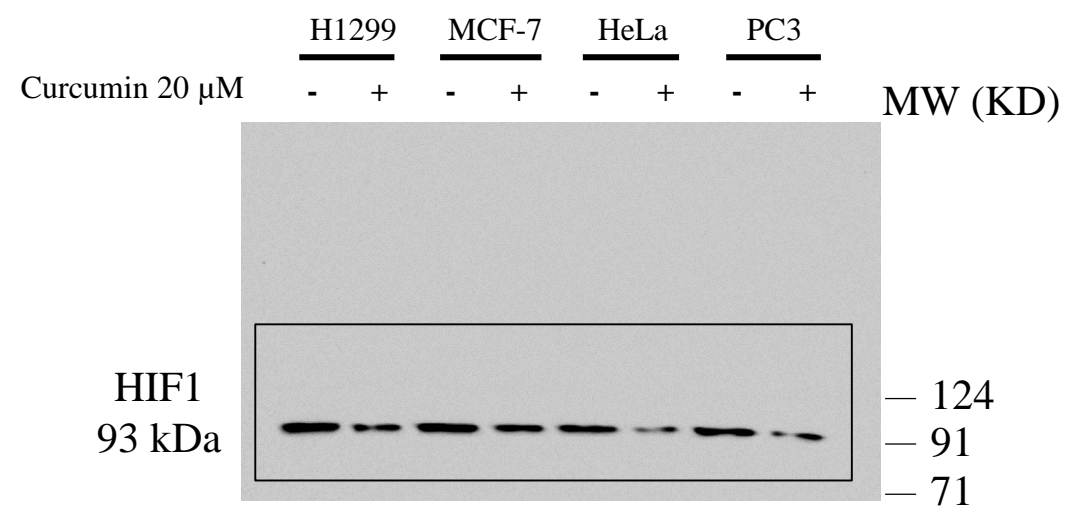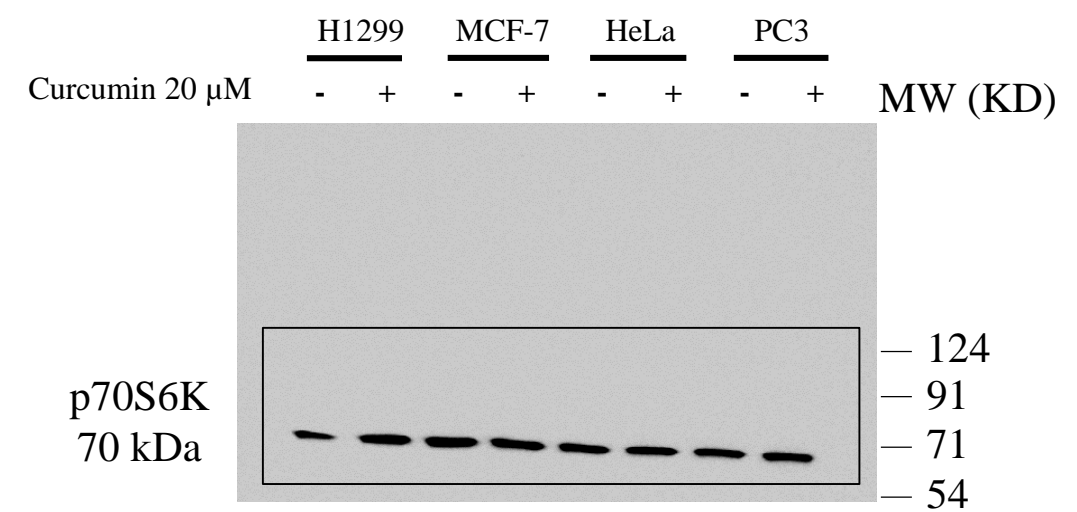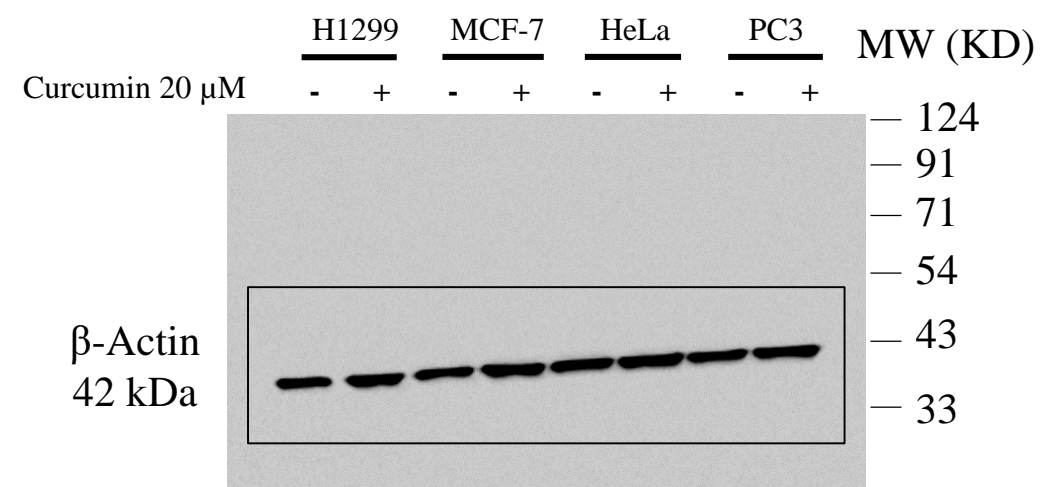

Supplement: 41598_2018_25524_MOESM1_ESM.pdf [file 41598_2018_25524_MOESM1_ESM.pdf]
